# Supplementary material for: Highly sensitive flexible three-axis tactile sensors based on the interface contact resistance of microstructured graphene
Source: Royal Society of Chemistry journal article supplement (doi:10.1039/c7nr09149d), 2018-01-01
Supplement: c7nr09149d1.pdf [file c7nr09149d1.pdf]

1 *Supplementary Information:*

2 **Highly Sensitive Flexible Three-Axis Tactile Sensors Based on the**  
3 **Interface Contact Resistance of Microstructured Graphene**

4 J. Zhang<sup>\*a, c</sup>, L. J. Zhou<sup>b</sup>, H. M. Zhang<sup>a</sup>, Z. X. Zhao<sup>a</sup>, S. L. Dong<sup>a</sup>, S. Wei<sup>a</sup>, J. Zhao<sup>c</sup>, Z. L. Wang<sup>a, c</sup>,  
5 B. Guo<sup>\*a</sup>, P. A. Hu<sup>\*a, c</sup>

6  
7 <sup>a</sup>Key Laboratory of Microsystems and Microstructure Manufacturing, Ministry of Education, Harbin  
8 Institute of Technology, No. 2 Yikuang Street, Harbin, 150080, China.

9 <sup>b</sup>School of Mechanical and Power Engineering, Harbin university of science and technology, No. 52,  
10 Xuefu Road, Harbin, 150080, China.

11 <sup>c</sup>State Key Laboratory of Robotics and System, Harbin Institute of Technology, No. 2 Yikuang  
12 Street, Harbin, 150080, China.

13 \*Corresponding Authors: zhangjia@hit.edu.cn. guobin@hit.edu.cn. hupa@hit.edu.cn

15

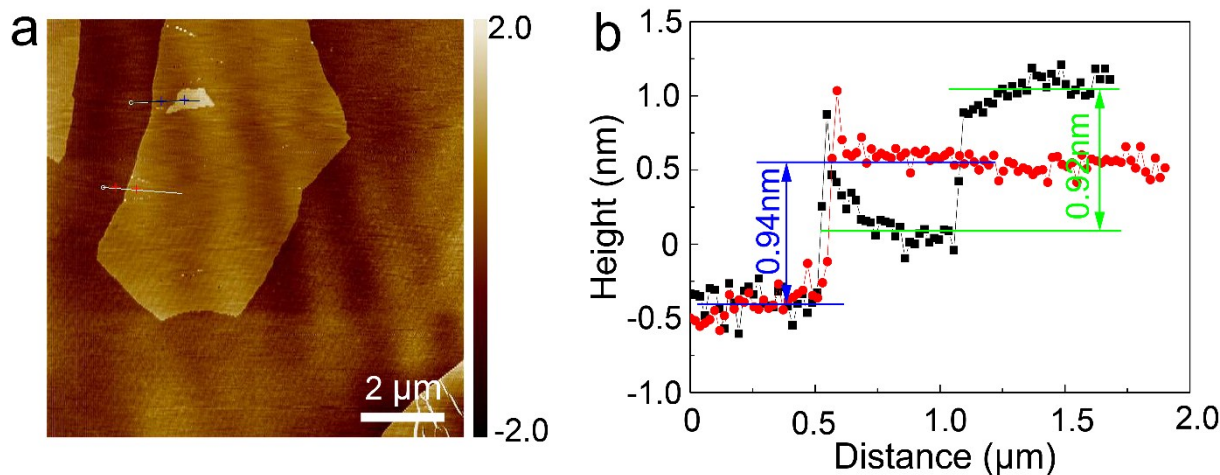

16

17 **Fig. S1** (a) AFM image of single graphene oxide sheet on the mica substrate. (b) Cross-section  
18 profile of lines marked in (a).

19

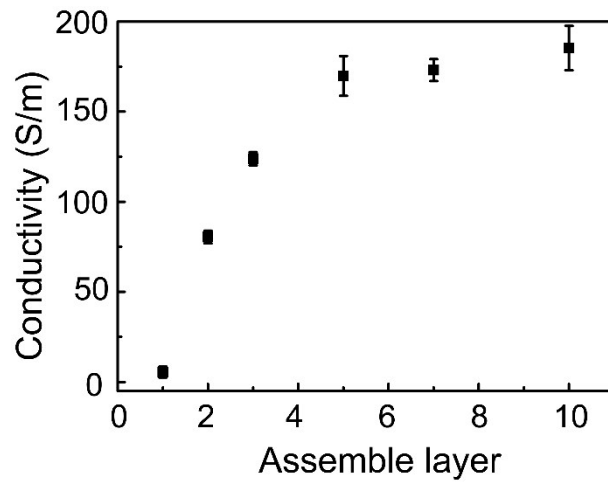

1  
 2 **Fig. S2** Conductivity of the hydrazine vapor reduced (rGO/PDDA) $_n$  film with different layers ( $n=1-$   
 3 10).

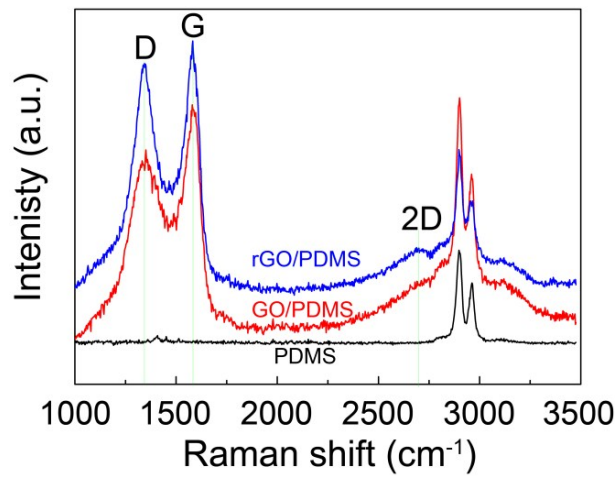

4  
 5  
 6  
 7 **Fig. S3** Raman spectra of patterned PDMS film, LBL assembled GO/PDMS, and hydrazine vapor  
 8 reduced rGO/PDMS.

9  
 10

1

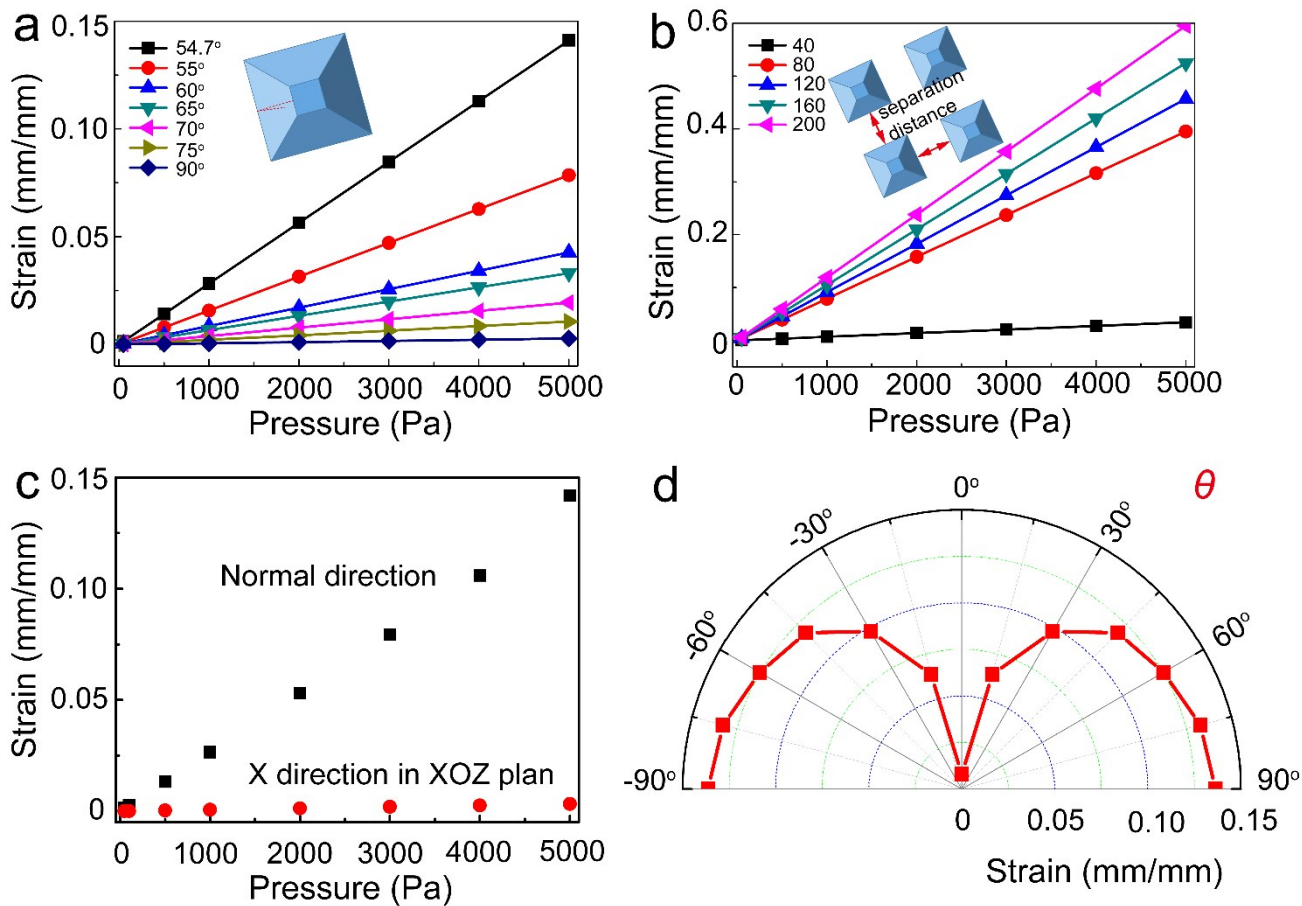

2

3 **Fig. S4** Simulation data of strain-stress relationship with different structural parameters. (a) Strain in  
 4 the normal direction (Z-axis) under the applied pressure at the different sidewall angled patterns. (b)  
 5 Strain in the normal direction with an increasing separation of pyramid-like patterns at the sidewall  
 6 angle of 54.7°. (c) Maximum strain on the top of pyramid structure under the normal pressure and  
 7 tangential pressure in XOZ plan along the X direction. (d) Plot strain of pyramid pattern to angles in  
 8 the polar coordinates, applied force  $F=1$  N.

9

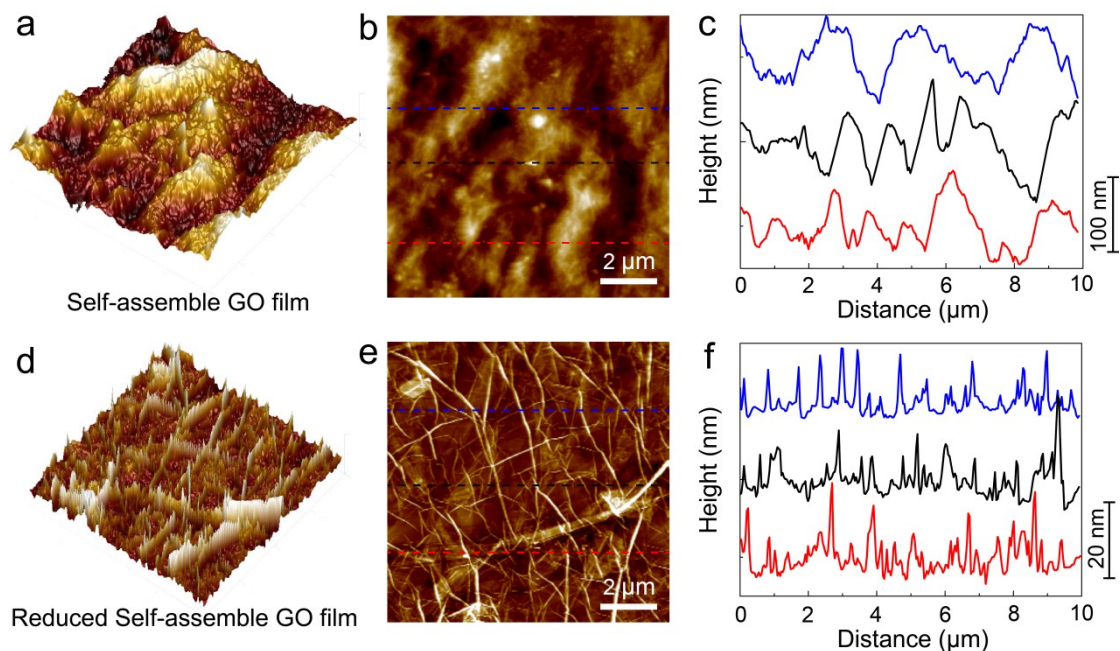

1  
2  
3  
4  
5

**Fig. S5** AFM images of LBL GO film and rGO film. (a) 3D view of LBL GO film, (b) Height image of GO film, (c) Cross-section profile of line marked in (b). (d) 3D view of LBL rGO film, (e) Height image of rGO film, (f) Cross-section profile of line marked in (e).

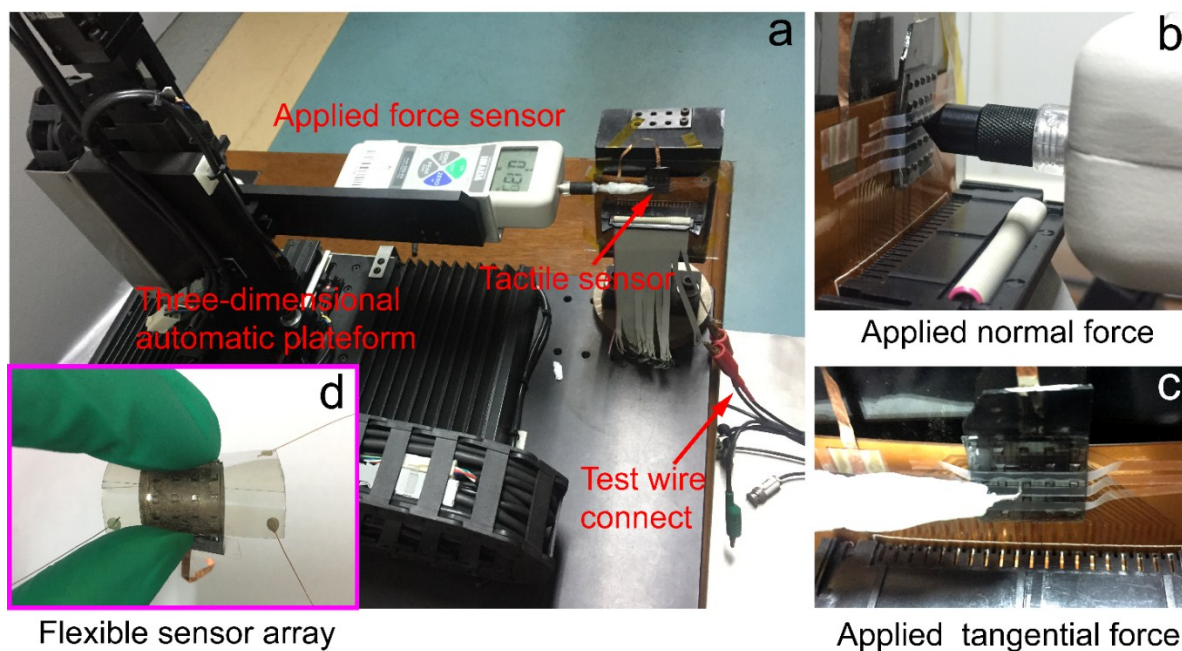

6  
7  
8

**Fig. S6** A home-made stage for tactile sensor tests. (a) Digital picture of the whole set up, (b) Applied normal force, (c) Applied tangential force. (d) A prototype flexible sensor array.

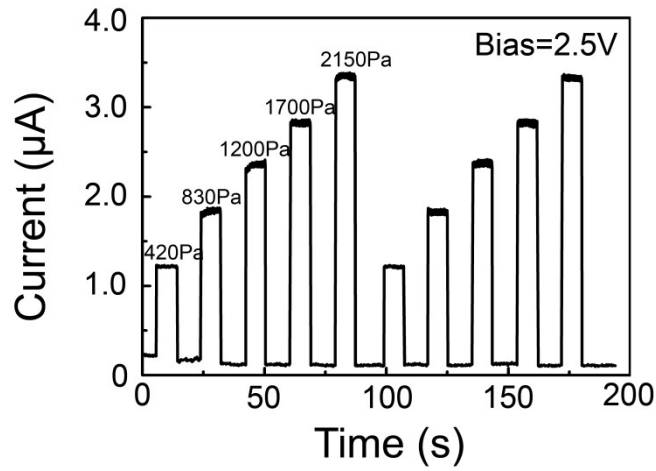

**Fig. S7** Stability of the sensor under the different applied pressures.

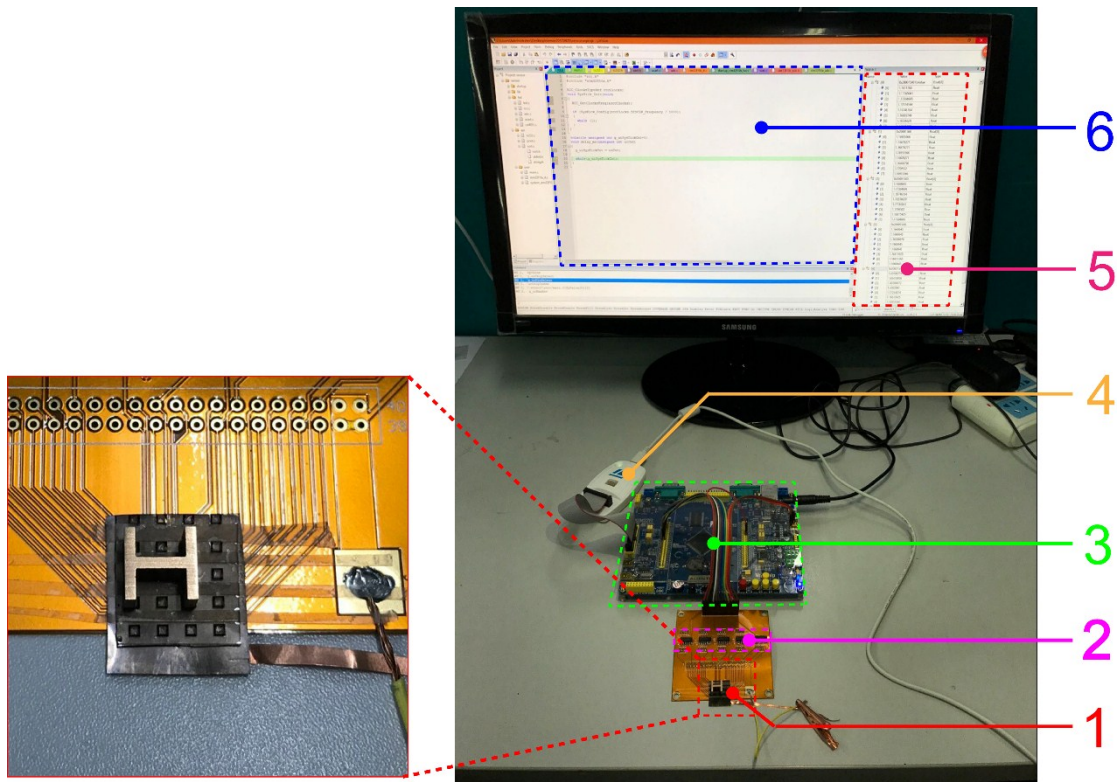

**Fig. S8** Proof of concept of integration sensor array with a home-made signal collection system including: 1-Flexible sensor, 2-Multi-channel signal acquisition, 3-STM32 microcontroller, 4-Data downloader, 5-Data displaying interface, 6-Main program interface.
